# Supplementary material
Source: PubMed Central journal article supplement (PMC2782856)
Supplement: NIHMS147229-supplement-supplement_1.pdf [file NIHMS147229-supplement-supplement_1.pdf]

**Supplemental Figure 1.** *Phenotypic characterization of MJDC, a DC-like cell line. A.*

This cell line (clone 2B1) was derived as described in Materials and Methods. Cells were analyzed for the expression of molecules that are characteristic of DC, including DEC205, CD11c, MHC class II, MHC class I, CD80, CD86. The thin line in each histogram represents isotype-control background staining. Where indicated, cells were treated with 100 U/ml interferon- $\gamma$  for 18 hours.

**Supplemental Figure 2.** *Localization of MARCH1 mutants.* Confocal microscopic analysis of DC2.4 cells stably expressing the indicated mutants. MARCH1 staining is shown *versus* the indicated markers: EEA-1 (early endosome) and Derlin-1 (ER). Note that a lower threshold was applied uniformly to each set of samples (imaged for a given marker) based on negative controls (background subtraction). The signal for MARCH1 (HA) and the marker protein in each set of images was normalized by setting the brightest pixel in each image (for each fluorescence channel) as the maximum signal (histogram-stretching) in order to facilitate visualization and comparison across fields.

Figure S1

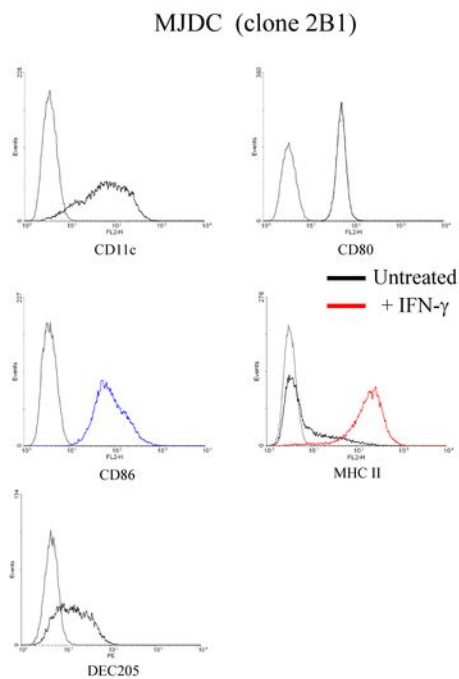

Figure S2

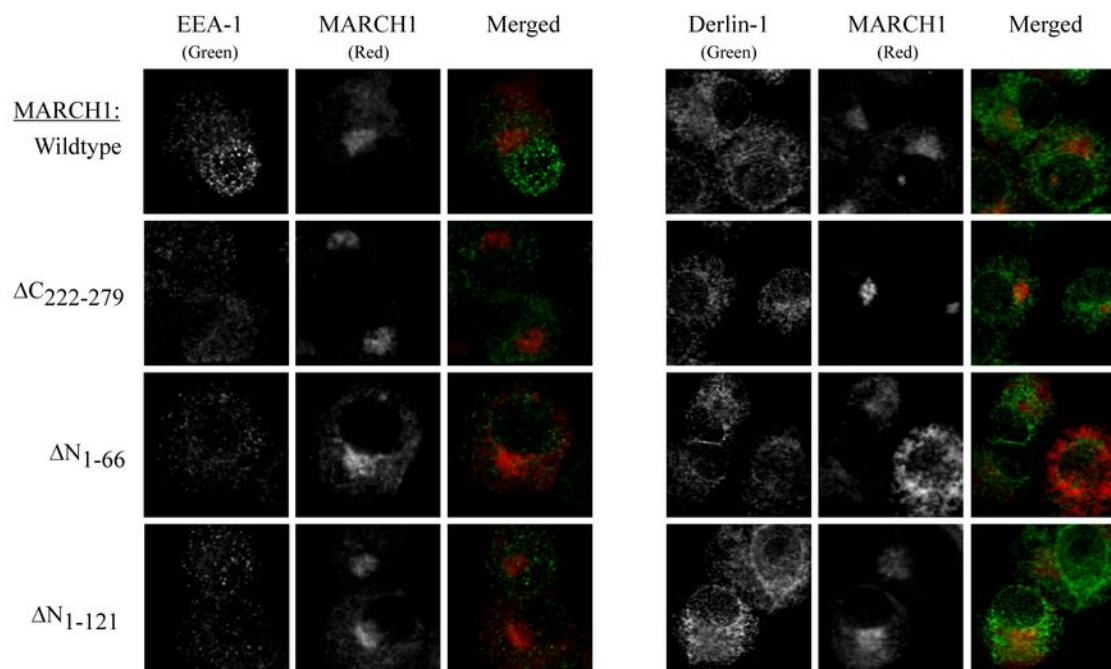

**Supplemental Figure 1.** *Phenotypic characterization of MJDC, a DC-like cell line. A.*

This cell line (clone 2B1) was derived as described in Materials and Methods. Cells were analyzed for the expression of molecules that are characteristic of DC, including DEC205, CD11c, MHC class II, MHC class I, CD80, CD86. The thin line in each histogram represents isotype-control background staining. Where indicated, cells were treated with 100 U/ml interferon- $\gamma$  for 18 hours.

**Supplemental Figure 2.** *Localization of MARCH1 mutants.* Confocal microscopic

analysis of DC2.4 cells stably expressing the indicated mutants. MARCH1 staining is shown *versus* the indicated markers: EEA-1 (early endosome) and Derlin-1 (ER). Note that a lower threshold was applied uniformly to each set of samples (imaged for a given marker) based on negative controls (background subtraction). The signal for MARCH1 (HA) and the marker protein in each set of images was normalized by setting the brightest pixel in each image (for each fluorescence channel) as the maximum signal (histogram-stretching) in order to facilitate visualization and comparison across fields.
